## Retraction

# Retraction: Long non-coding RNA linc-ITGB1 promotes cell proliferation, migration and invasion in human hepatoma carcinoma by upregulating ROCK1

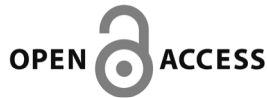

This Retraction follows an Expression of Concern relating to this article previously published by Portland Press.

This article is being retracted from *Bioscience Reports* at the request of the Editor-in-Chief and the Editorial Board following receipt of a notification from a reader, alerting the Editorial Board to incorrect nucleotide sequence reagents listed. The errors in this article were identified using The Seek & Blastn tool by Labbé et al. 2019 (<https://doi.org/10.1371/journal.pone.0213266>).

The authors have been contacted with regards to the retraction, and have not responded to the Journal's queries and the concerns raised. Given the extent of the issues raised, the Editorial Board stand by the decision to retract the article.

Version of Record published:  
02 March 2023
